# Supplementary material for: A Brief Online and Offline (Paper-and-Pencil) Screening Tool for Generalized Anxiety Disorder: The Final Phase in the Development and Validation of the Mental Health Screening Tool for Anxiety Disorders (MHS: A)
Source: PubMed Central journal article supplement (PMC7937919; doi:10.3389/fpsyg.2021.639366), 2021-02-22
Supplement: Table_1.pdf [file Table_1.pdf]

**Supplementary Table 1.** Correlation between each item – Offline version

|                                | 1      | 2      | 3      | 4      | 5      | 6      | 7      | 8      | 9      | 10     |
|--------------------------------|--------|--------|--------|--------|--------|--------|--------|--------|--------|--------|
| 1 Excessive anxiety            | 1      |        |        |        |        |        |        |        |        |        |
| 2 Uncontrollable worry         | .801** | 1      |        |        |        |        |        |        |        |        |
| 3 Restlessness                 | .822** | .806** | 1      |        |        |        |        |        |        |        |
| 4 Fatigue                      | .667** | .657** | .690** | 1      |        |        |        |        |        |        |
| 5 Attention difficulty         | .688** | .647** | .694** | .781** | 1      |        |        |        |        |        |
| 6 Irritability                 | .711** | .702** | .706** | .695** | .710** | 1      |        |        |        |        |
| 7 Muscle tension               | .572** | .620** | .586** | .669** | .595** | .672** | 1      |        |        |        |
| 8 Insomnia                     | .568** | .585** | .596** | .639** | .605** | .618** | .680** | 1      |        |        |
| 9 Impairment in daily function | .769** | .674** | .754** | .669** | .718** | .713** | .555** | .600** | 1      |        |
| 10 Chest discomfort            | .691** | .656** | .671** | .647** | .616** | .623** | .610** | .618** | .657** | 1      |
| 11 Feeling on edge             | .732** | .688** | .757** | .660** | .639** | .748** | .635** | .634** | .722** | .735** |

**Supplementary Table 2.** Correlation between each item – Online version

|                                | 1       | 2       | 3       | 4       | 5       | 6       | 7       | 8       | 9       | 10      |
|--------------------------------|---------|---------|---------|---------|---------|---------|---------|---------|---------|---------|
| 1 Excessive anxiety            | 1       |         |         |         |         |         |         |         |         |         |
| 2 Uncontrollable worry         | .788*** | 1       |         |         |         |         |         |         |         |         |
| 3 Restlessness                 | .801*** | .787*** | 1       |         |         |         |         |         |         |         |
| 4 Fatigue                      | .579*** | .619*** | .631*** | 1       |         |         |         |         |         |         |
| 5 Attention difficulty         | .639*** | .680*** | .681*** | .743*** | 1       |         |         |         |         |         |
| 6 Irritability                 | .717*** | .710*** | .716*** | .623*** | .689*** | 1       |         |         |         |         |
| 7 Muscle tension               | .564*** | .619*** | .601*** | .667*** | .616*** | .692*** | 1       |         |         |         |
| 8 Insomnia                     | .533*** | .595*** | .569*** | .620*** | .645*** | .587*** | .654*** | 1       |         |         |
| 9 Impairment in daily function | .741*** | .736*** | .744*** | .646*** | .729*** | .702*** | .602*** | .600*** | 1       |         |
| 10 Chest discomfort            | .685*** | .692*** | .686*** | .602*** | .649*** | .649*** | .637*** | .555*** | .682*** | 1       |
| 11 Feeling on edge             | .748*** | .727*** | .786*** | .613*** | .650*** | .762*** | .659*** | .620*** | .712*** | .728*** |

**Supplementary Table 3.** Factor loading from EFA

|                                | Offline version | Online version |
|--------------------------------|-----------------|----------------|
|                                | Factor Loading  | Factor Loading |
| 1 Excessive anxiety            | 0.865           | 0.835          |
| 2 Uncontrollable worry         | 0.835           | 0.858          |
| 3 Restlessness                 | 0.876           | 0.874          |
| 4 Fatigue                      | 0.808           | 0.755          |
| 5 Attention difficulty         | 0.825           | 0.807          |
| 6 Irritability                 | 0.842           | 0.832          |
| 7 Muscle tension               | 0.734           | 0.743          |
| 8 Insomnia                     | 0.724           | 0.769          |
| 9 Impairment in daily function | 0.829           | 0.861          |
| 10 Chest discomfort            | 0.764           | 0.81           |
| 11 Feeling on edge             | 0.851           | 0.876          |

**Supplementary Table 4.** AUC for each item

|                                | MHS: A Offline AUC | MHS: A Online AUC |
|--------------------------------|--------------------|-------------------|
| 1 Excessive anxiety            | 0.915              | 0.899             |
| 2 Uncontrollable worry         | 0.888              | 0.911             |
| 3 Restlessness                 | 0.911              | 0.903             |
| 4 Fatigue                      | 0.874              | 0.859             |
| 5 Attention difficulty         | 0.889              | 0.903             |
| 6 Irritability                 | 0.879              | 0.885             |
| 7 Muscle tension               | 0.820              | 0.820             |
| 8 Insomnia                     | 0.852              | 0.829             |
| 9 Impairment in daily function | 0.922              | 0.905             |
| 10 Chest discomfort            | 0.855              | 0.897             |
| 11 Feeling on edge             | 0.896              | 0.920             |

**Supplementary Figure 1. ICC for each item of Offline version MHS: A**

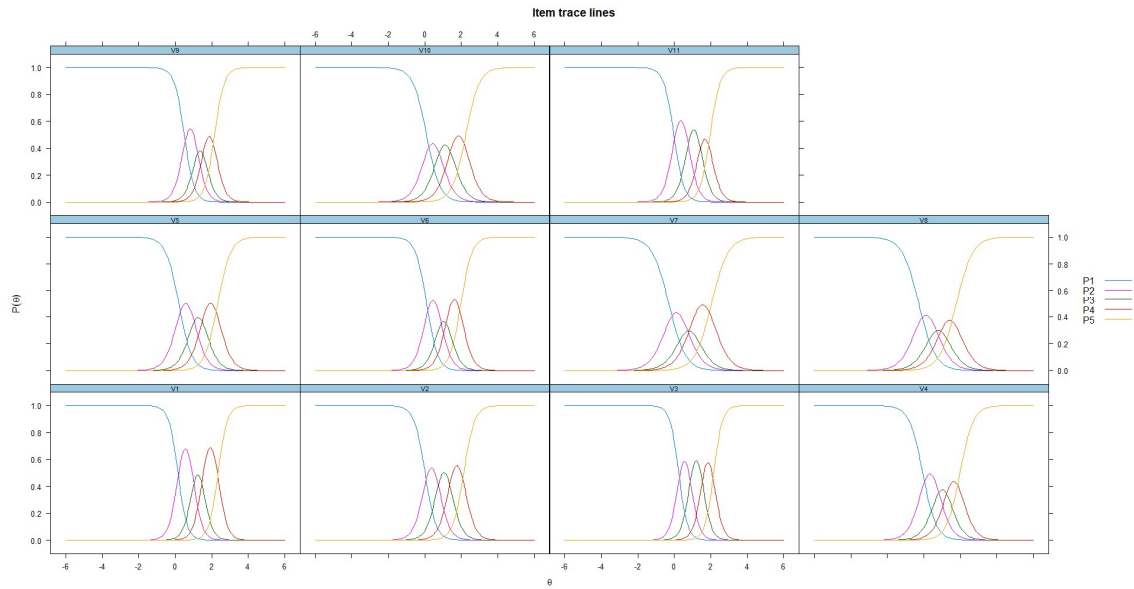

*Note.*  $P(\theta)$ : probability of a response in the given category across different anxiety levels,  $\theta$ : level of anxiety expressed in terms of standard deviation

**Supplementary Figure 2. ICC for each item of Online version MHS: A**

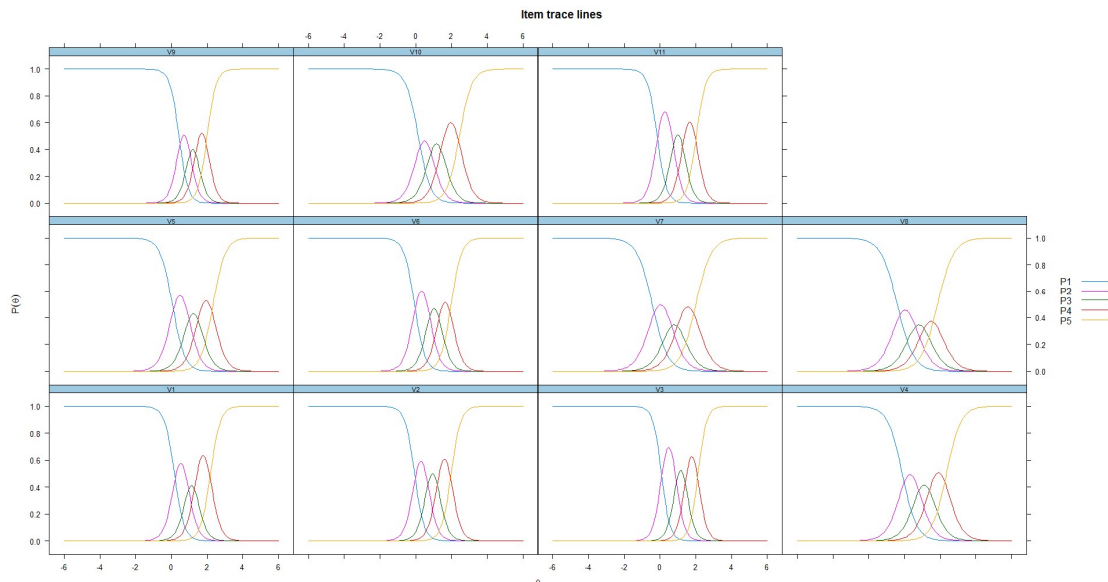

*Note.*  $P(\theta)$ : probability of a response in the given category across different anxiety levels,  $\theta$ : level of anxiety expressed in terms of standard deviation

**Supplementary Figure 3. TIC for Offline and Online version of MHS: A**

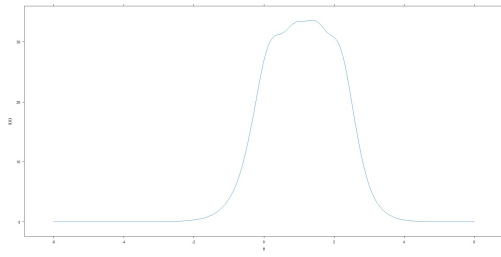

Test Information Curve for Offline MHS: A

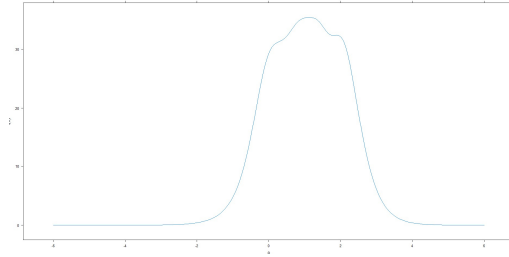

Test Information Curve for Online MHS: A

*Note.*  $I(\theta)$ : Information value,  $\theta$ : level of anxiety expressed in terms of standard deviation
